# Supplementary material for: Excellent catalytic oxidation performance on toluene and benzene over OMS-2 with a hierarchical porous structure synthesized by a one-pot facile method: modifying surface properties by introducing different amounts of K
Source: Royal Society of Chemistry journal article supplement (doi:10.1039/d2cy00032f), 2022-01-01
Supplement: d2cy00032f1.pdf [file d2cy00032f1.pdf]

## **Electronic Supplementary Information (ESI)**

**Excellent catalytic oxidation performance on toluene and benzene over OMS-2 with hierarchical pore structure synthesized by one-pot facile method: Modifying surface property by introducing different K amount**

Xiaotong Wang, Yanling Sun, Mingyang Li, Wanlu Zhang, Yujun Zhu\*

Key Laboratory of Functional Inorganic Material Chemistry (Heilongjiang University),  
Ministry of Education, School of Chemistry and Materials, Heilongjiang University, Harbin,  
150080 P. R. China

## **The detail information of the chemicals and characterizations**

### **1.1 The manufacturers of chemicals**

KMnO<sub>4</sub> (FuChen Chemical Reagents Co., Ltd), PVP (polyvinylpyrrolidone, Tianjin GuangFu Fine Chemical Research Institute), 50 wt.% Mn(NO<sub>3</sub>)<sub>2</sub> solution (Shanghai Aladdin Biochemical Technology Co., Ltd.), KOH (FuChen Chemical Reagents Co., Ltd), Quartz (Tianjin GuangFu Fine Chemical Research Institute).

### **1.2 Characterization of catalysts**

X-ray diffraction (XRD) was performed on Bruker D8 Advance X-ray diffractometer with a Cu K $\alpha$  ( $\lambda = 1.5418 \text{ \AA}$ ) source (40 kV, 40 mA), and the  $2\theta$  angle was in the range of 5-80°. N<sub>2</sub> adsorption-desorption tests were executed at -196 °C using Micromeritics physical adsorption apparatus (ASAP 2020) in order to obtain BET surface area ( $S_{\text{BET}}$ ) and the pore characterization of the samples. The catalyst was pretreated in pure N<sub>2</sub> at 300 °C for 4 h and then at 90 °C for 1 h before the test for purpose of removing the physically adsorbed impurities. The bulk chemical composition of the catalysts was acquired by X-Ray fluorescence (XRF) spectrum conducted on Bruker S4 Explorer. The morphology of the samples was obtained through scanning electron microscope (SEM) (Hitachi S-4800 microscope) and transmission electron microscope (TEM) (Tecnai G2 F30) at 15 and 300 kV, respectively. The surface composition and properties were tested by X-ray photoelectron spectroscopy (XPS) on Kratos-AXIS ULTRADLD by using an Al K $\alpha$  radiation source, and the binding energy of C1s at 284.7 eV was considered as internal reference. The outlet gas was analyzed by an on-line gas monitoring mass spectrometry (MS)(QIC-20, Hidden) with the  $m/z = 32$  fragment (O<sub>2</sub> signal).

AutoChem TP5080 instrument (Xianquan, China) with a TCD detector was used to obtain the curves of temperature programmed reduction with H<sub>2</sub> (H<sub>2</sub>-TPR) and temperature programmed desorption of O<sub>2</sub> (O<sub>2</sub>-TPD). For H<sub>2</sub>-TPR test, 0.020 g catalyst was pre-treated in pure O<sub>2</sub> at 300 °C for 1 h and then cooled down to room temperature. Afterwards, the catalyst was heated from room temperature to 550 °C in 5% H<sub>2</sub>/N<sub>2</sub> mix atmosphere at a rate of 30 mL/min. For O<sub>2</sub>-TPD test, 0.100 g sample was pre-treated at 300 °C in pure O<sub>2</sub> for 1 h. After the sample was cooled down to room temperature, the pure He with a rate of 30 mL/min was

introduced into the system and then heated from room temperature to 850 °C.

In situ diffuse reflectance infrared Fourier transform spectroscopy (DRIFTS) was recorded on Nicolet 6700 with a high-sensitive MCT detector cooled by liquid N<sub>2</sub>. The catalyst mixed with KBr powder was put into the diffuse reflection cell (Harrick) and pre-treated in pure N<sub>2</sub> or 20% O<sub>2</sub>/N<sub>2</sub> at 300 °C. Thereafter, the sample was cooled down to different reaction temperature to collect the background. Then, 1000 ppm toluene/benzene and N<sub>2</sub> as the carrier with or without O<sub>2</sub> were introduced into the reaction cell at the total flow of 100 mL/min.

### 1.3 Activity evaluation of catalysts

0.300 g catalyst (40-60 mesh) was mixed with 0.600 g quartz (Tianjin GuangFu Fine Chemical Research Institute), and put into a fixed bed Quartz tube reactor together. The feed includes 18 vol% O<sub>2</sub>/N<sub>2</sub> and 1000 ppm toluene/benzene introduced by pure N<sub>2</sub> with the rate of 8 mL/min at 5 °C, the total flow velocity of 100 mL/min. The weight hourly space velocity (WHSV) is 20,000 mL h<sup>-1</sup> g<sup>-1</sup>. The catalytic activity measurement was performed on an online gas chromatograph (GC2100, Beifen Ruili, Beijing, China) with FID detector and KB-1 capillary column (30 m × 0.25 mm × 0.25 μm). The on-line mass spectrometer (MS) (QC20, Hidden) was used to analyze the products. The conversion of the reactant (toluene and benzene) was calculated as follows:

$$\text{Conversion} = [c(\text{Reactant})_{\text{inlet}} - c(\text{Reactant})_{\text{outlet}}] / c(\text{Reactant})_{\text{inlet}} \times 100\% \quad (1)$$

Whereas,  $c(\text{Reactant})_{\text{inlet}}$  and  $c(\text{Reactant})_{\text{outlet}}$  represent the inlet and outlet concentration of toluene/benzene, respectively.

The reaction rate ( $r$ ) and the apparent activation energy ( $E_a$ ) for the oxidation of toluene and benzene are calculated based on the general formula (2) and (3), respectively:

$$r = -kc^m \quad (2)$$

$$k = -A \exp(-E_a/RT) \quad (3)$$

Where,  $k$ ,  $c$ ,  $m$ ,  $A$  and  $T$  stand for the rate constant, concentration of toluene/benzene, reaction order, pre-exponential factor and reaction temperature, respectively.

## Table of Contents

**Fig. S1** Raman spectra of OMS-2 (a), OMS-2-1A(b), OMS-2-1.5A(c), OMS-2-2.5A(d) and OMS-2-3.5A(e)

**Fig. S2** SEM image of OMS-2-3.5A

**Fig. S3** The fitting peaks of O<sub>2</sub>-TPD curves in the range of 100-700 °C for OMS-2 and OMS-2-xA samples

**Table S1** O<sub>2</sub> desorption amount of OMS-2 and OMS-2-xA samples

**Fig. S4** The relationship between surface Mn<sup>4+</sup> and lattice oxygen species.

**Table S2** The catalytic toluene and benzene oxidation results of the prepared four samples.

**Fig. S5** The activity of OMS-2-2.5A with different WHSVs during toluene oxidation process

**Table S3** Comparison of catalytic performance over different K modified OMS-2 catalysts for VOC oxidation

**Fig. S6** Catalytic performance with 3% H<sub>2</sub>O addition of toluene oxidation (a) and benzene oxidation (b)

**Fig. S7** The MS signal of the CO<sub>2</sub>, C<sub>7</sub>H<sub>8</sub>, C<sub>6</sub>H<sub>5</sub>COOH, C<sub>6</sub>H<sub>5</sub>CHO and H<sub>2</sub>O at different reaction temperature (a: 190 °C, b: 200 °C, c: 210 °C) and the comparison of CO<sub>2</sub>, H<sub>2</sub>O and C<sub>7</sub>H<sub>8</sub> at 190, 200 and 210 °C (d) for OMS-2-2.5A.

**Fig. S8** Activity stability as a function of time with 10% H<sub>2</sub>O at 208 °C of OMS-2-2.5A during catalytic toluene oxidation process

**Fig. S9** XRD patterns(a) and H<sub>2</sub>-TPR(b) curves of OMS-2, used OMS-2, OMS-2-2.5A and used OMS-2-2.5A

**Fig. S10** XPS for Mn2p (a), O1s (b) of fresh and used catalysts (OMS-2 and OMS-2-2.5A)

**Table S4** Assignment of IR bands of toluene and benzene adsorption process

**Fig. S11** The amount of -COO<sup>-</sup> and -CH<sub>3</sub> species at different temperature for OMS-2-2.5A without (a) and with (b) adsorbed oxygen species.

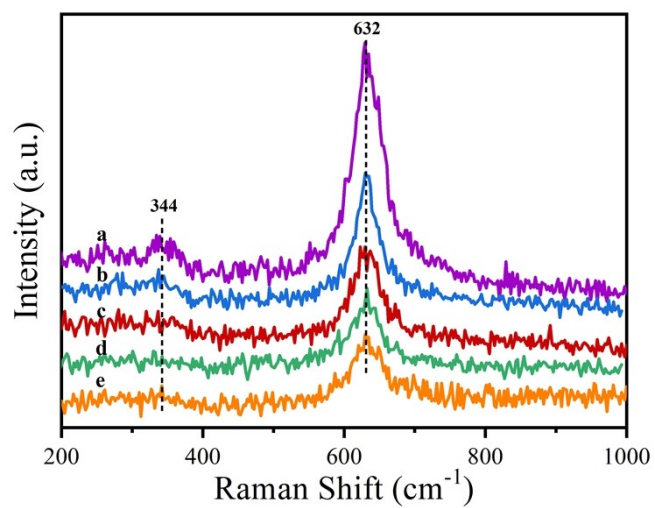

**Fig. S1** Raman spectra of OMS-2 (a), OMS-2-1A(b), OMS-2-1.5A(c), OMS-2-2.5A(d) and OMS-2-3.5A(e)

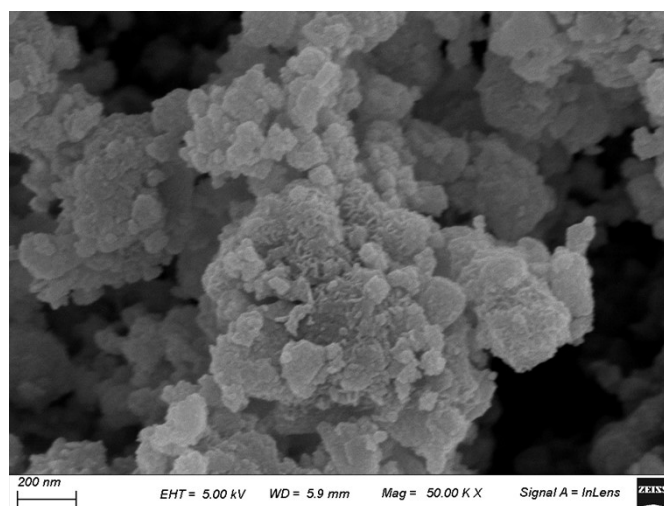

**Fig. S2** SEM image of OMS-2-3.5A

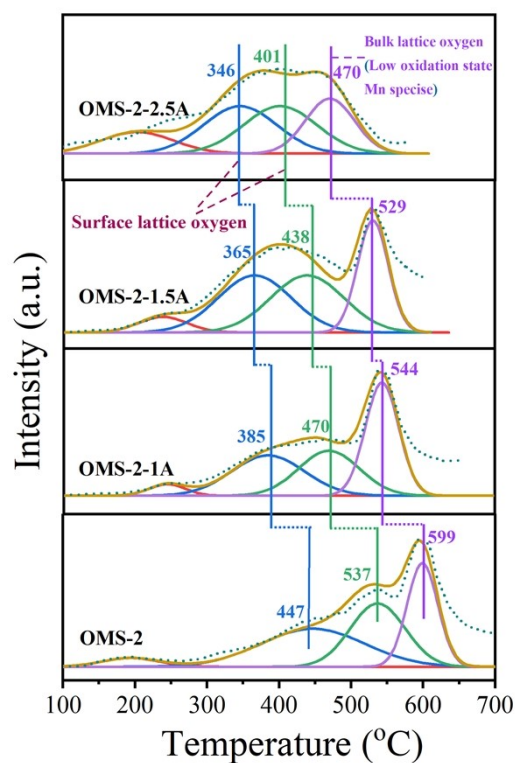

**Fig. S3** The fitting peaks of O<sub>2</sub>-TPD curves in the range of 100-700 °C for OMS-2 and OMS-2-xA samples

**Table S1** O<sub>2</sub> desorption amount of OMS-2 and OMS-2-xA samples

| Catalyst   | O <sub>2</sub> desorption amount (μmol/g) <sup>a</sup> |                                           |                                          |                                    |       |
|------------|--------------------------------------------------------|-------------------------------------------|------------------------------------------|------------------------------------|-------|
|            | O <sub>ad</sub>                                        | Surface O <sub>latt</sub>                 | low oxidation state Mn O <sub>latt</sub> | Mn <sup>4+</sup> O <sub>latt</sub> | Total |
|            | (Peak I)                                               | (Peak II <sub>1</sub> , II <sub>2</sub> ) | (Peak III)                               | (Peak IV)                          |       |
| OMS-2      | 40.8                                                   | 153.1                                     | 157.3                                    | 154.9                              | 506.1 |
| OMS-2-1A   | 31.1                                                   | 161.7                                     | 101.1                                    | 192.2                              | 486.1 |
| OMS-2-1.5A | 25.9                                                   | 163.5                                     | 54.2                                     | 196.2                              | 439.8 |
| OMS-2-2.5A | 21.4                                                   | 170.8                                     | 34.9                                     | 210.6                              | 437.7 |

<sup>a</sup> Calculated from the peaks of O<sub>2</sub>-TPD profiles

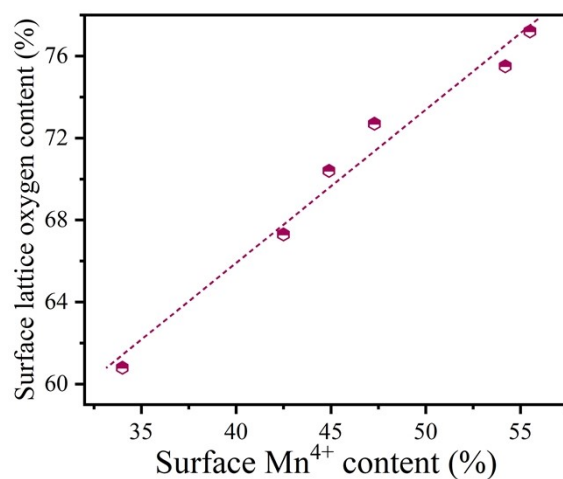

**Fig. S4** The relationship between surface  $\text{Mn}^{4+}$  and lattice oxygen species.

**Table S2** The catalytic toluene and benzene oxidation results of the prepared four samples.

| Catalyst   | Toluene oxidation (WHSV:20000 $\text{h}^{-1}$ ) |                        |                                   |                     | Benzene oxidation (WHSV:60000 $\text{h}^{-1}$ ) |                        |                                   |                     |
|------------|-------------------------------------------------|------------------------|-----------------------------------|---------------------|-------------------------------------------------|------------------------|-----------------------------------|---------------------|
|            | $T_{50}$                                        | $T_{90}$               | $r_{210} \times 10^{-6}^b$        | Ea                  | $T_{50}$                                        | $T_{90}$               | $r_{210} \times 10^{-6}^c$        | Ea                  |
|            | ( $^{\circ}\text{C}$ )                          | ( $^{\circ}\text{C}$ ) | ( $\text{mol/g}\cdot\text{min}$ ) | ( $\text{kJ/mol}$ ) | ( $^{\circ}\text{C}$ )                          | ( $^{\circ}\text{C}$ ) | ( $\text{mol/g}\cdot\text{min}$ ) | ( $\text{kJ/mol}$ ) |
| OMS-2      | 227                                             | 238                    | 4.78                              | 42.3                | 257                                             | -                      | 3.03                              | 50.1                |
| OMS-2-1A   | 217                                             | 229                    | 5.14                              | 32.8                | 221                                             | 255                    | 3.43                              | 39.3                |
| OMS-2-1.5A | 213                                             | 220                    | 5.60                              | 31.5                | 215                                             | 241                    | 4.09                              | 37.2                |
| OMS-2-2.5A | 200                                             | 207                    | 6.43                              | 19.8                | 205                                             | 233                    | 4.53                              | 30.9                |

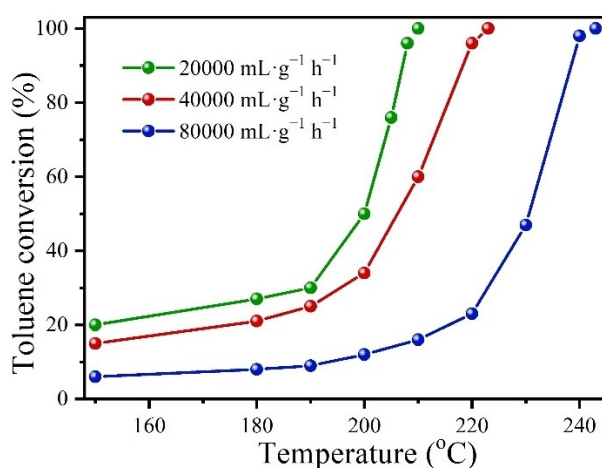

**Fig. S5** The activity of OMS-2-2.5A with different WHSVs during toluene oxidation process

**Table S3** Comparison of catalytic performance over different K modified OMS-2 catalysts for VOC oxidation

| Catalyst                                         | Preparation method     | Toluene/<br>Benzene | T <sub>90</sub><br>(°C) | Concentration<br>(ppm) | Space velocity<br>(mL g <sup>-1</sup> h <sup>-1</sup> ) | Reference |
|--------------------------------------------------|------------------------|---------------------|-------------------------|------------------------|---------------------------------------------------------|-----------|
| KMn2                                             | One-pot hydrothermal   | Benzene             | 240                     | 2000                   | 48000                                                   | 21        |
| 4-K/MnO <sub>2</sub>                             | Two- step hydrothermal | Toluene             | 216                     | 1000                   | 50000                                                   | 27        |
| Post-K/MnO <sub>2</sub>                          | Impregnation           | Toluene             | 228                     | 1000                   | 50000                                                   | 28        |
| Pre-K/MnO <sub>2</sub>                           | Two-step Hydrothermal  | Toluene             | 242                     | 1000                   | 50000                                                   | 28        |
| KOH/MnO <sub>2</sub>                             | Two- step hydrothermal | Toluene             | 226                     | 1000                   | 50000                                                   | 36        |
| KCl/MnO <sub>2</sub>                             | Two- step hydrothermal | Toluene             | 243                     | 1000                   | 50000                                                   | 36        |
| K <sub>2</sub> SO <sub>4</sub> /MnO <sub>2</sub> | Two- step hydrothermal | Toluene             | 236                     | 1000                   | 50000                                                   | 36        |
| KNO <sub>3</sub> /MnO <sub>2</sub>               | Two- step hydrothermal | Toluene             | 319                     | 1000                   | 50000                                                   | 36        |
| OMS-2-2.5A                                       | One-pot hydrothermal   | Toluene             | 207                     | 1000                   | 20000                                                   | This work |
| OMS-2-2.5A                                       | One-pot hydrothermal   | Toluene             | 218                     | 1000                   | 40000                                                   | This work |
| OMS-2-2.5A                                       | One-pot hydrothermal   | Benzene             | 233                     | 1000                   | 60000                                                   | This work |

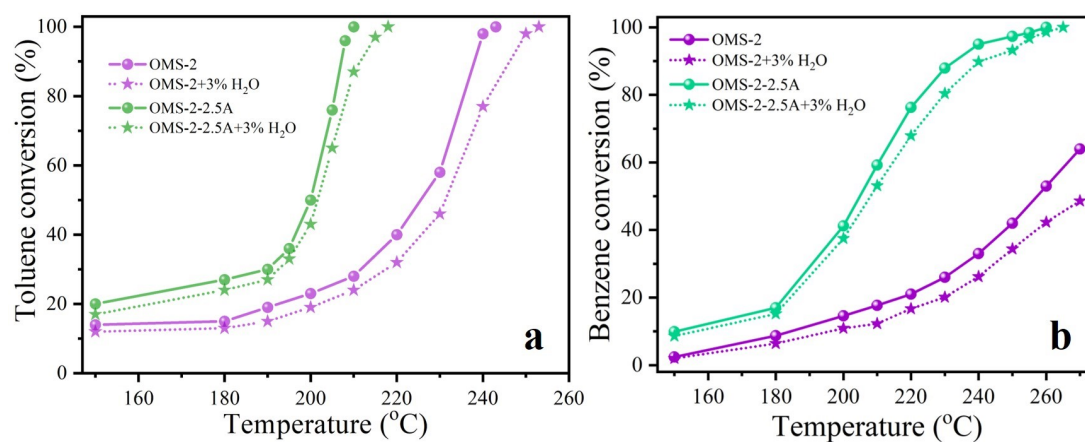

**Fig. S6** Catalytic performance with 3% H<sub>2</sub>O addition of toluene oxidation (a) and benzene oxidation (b)

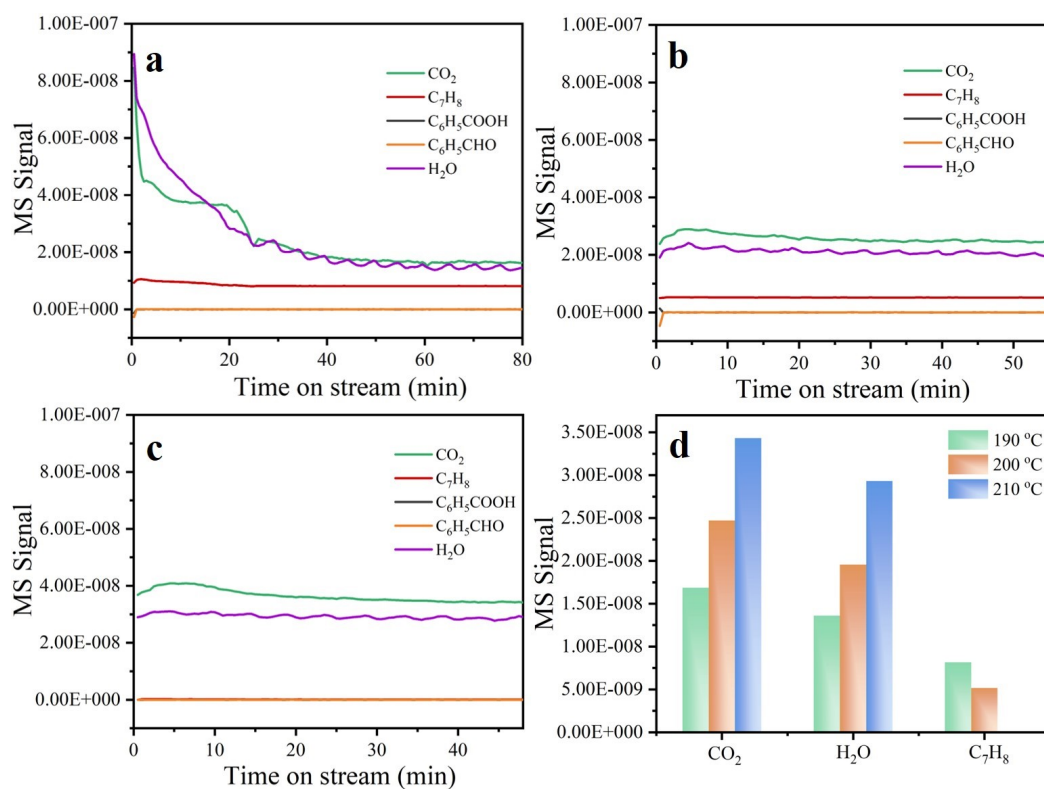

**Fig. S7** The MS signal of the  $\text{CO}_2$ ,  $\text{C}_7\text{H}_8$ ,  $\text{C}_6\text{H}_5\text{COOH}$ ,  $\text{C}_6\text{H}_5\text{CHO}$  and  $\text{H}_2\text{O}$  at different reaction temperature (a: 190 °C, b: 200 °C, c: 210 °C) and the comparison of  $\text{CO}_2$ ,  $\text{H}_2\text{O}$  and  $\text{C}_7\text{H}_8$  at 190, 200 and 210 °C (d) for OMS-2-2.5A.

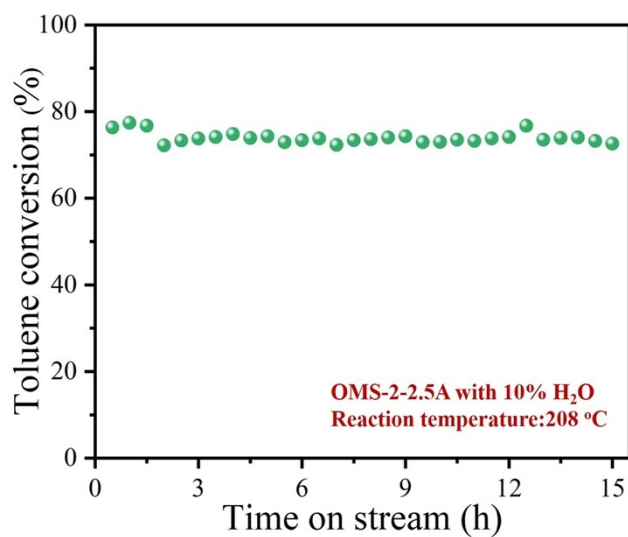

**Fig. S8** Activity stability as a function of time with 10%  $\text{H}_2\text{O}$  at 208 °C of OMS-2-2.5A during catalytic toluene oxidation process

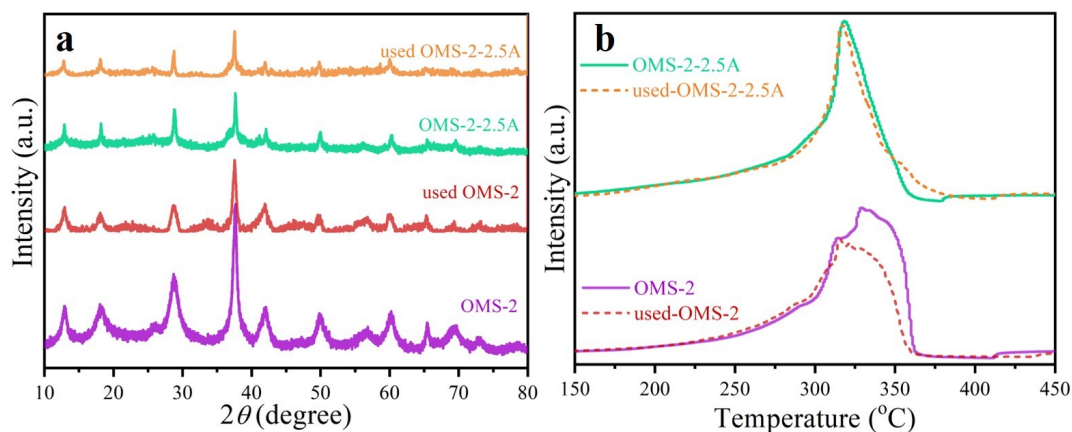

**Fig. S9** XRD patterns(a) and  $H_2$ -TPR(b) curves of OMS-2, used OMS-2, OMS-2-2.5A and used OMS-2-2.5A

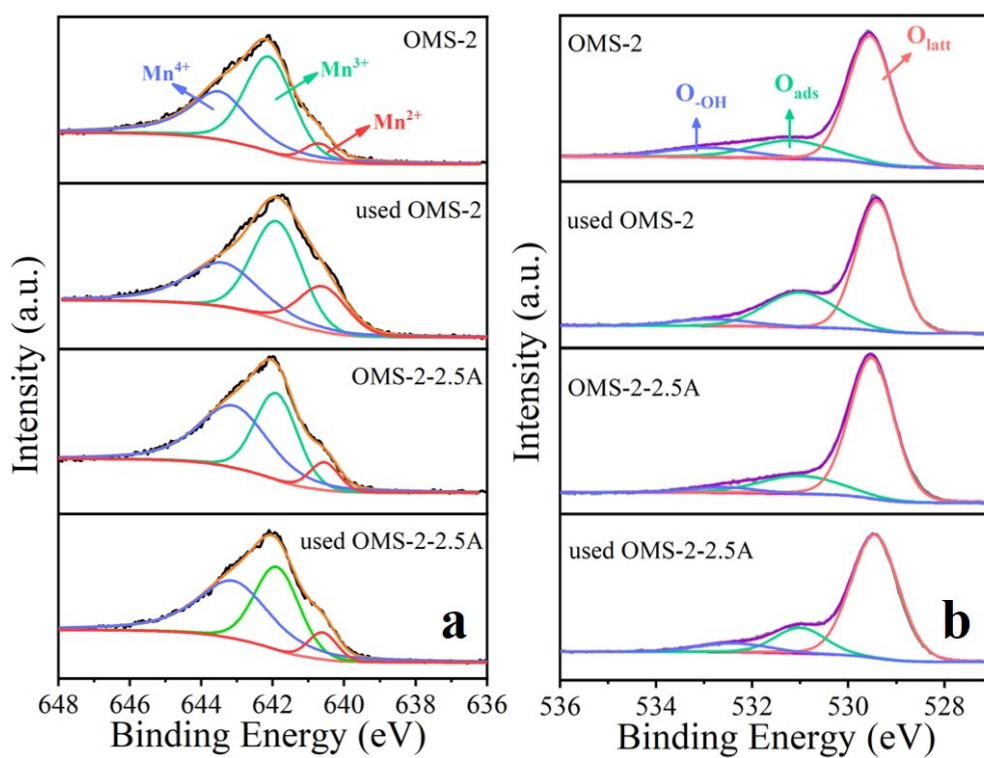

**Fig. S10** XPS for Mn2p (a), O1s (b) of fresh and used catalysts (OMS-2 and OMS-2-2.5A)

**Table S4** Assignment of IR bands of toluene and benzene adsorption process

| Position/cm <sup>-1</sup> | Assignment                     |
|---------------------------|--------------------------------|
| 1170, 1136, 1196, ~1340   | -C-O- of benzyl alcohol        |
| 1339, 1390, ~1396, ~1489  | -CH <sub>3</sub> methyl group  |
| 1316, ~1429, 1521         | maleate                        |
| 1373, ~1539               | -COO <sup>-</sup> of benzoate  |
| 1594, ~1452, ~1510, ~1619 | C=C of aromatic ring           |
| ~1645                     | -CHO of benzaldehyde           |
| ~1712, ~1681              | benzoquinone                   |
| 1730                      | quinone                        |
| ~1795, ~1745, ~1865       | Five-membered cyclic anhydride |

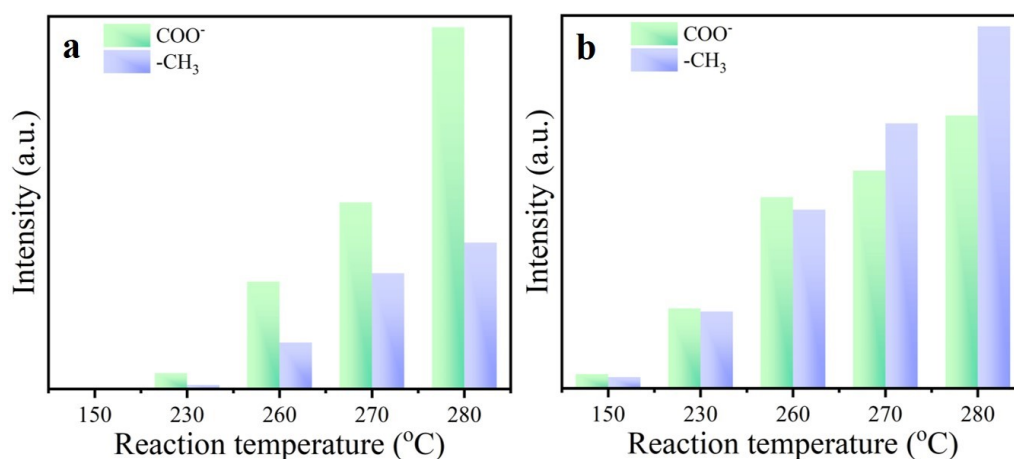**Fig. S11** The amount of -COO<sup>-</sup> and -CH<sub>3</sub> species at different temperature for OMS-2-2.5A without (a) and with (b) adsorbed oxygen species.
